**Title:** Matching Clinical Profiles with Interventions to Optimize Daily Stepping in People with Stroke

**Short Title:** Secondary Analysis of the PROWALKS RCT

**Authors:** Kiersten M. McCartney, DPT<sup>1,2</sup>, Ryan T. Pohlig, PhD<sup>3</sup>, Allison Miller, DPT, PhD<sup>4</sup>, Elizabeth D. Thompson, DPT, PhD<sup>1</sup>, Darcy Reisman, PT, PhD, FAPTA<sup>1,2</sup>

<sup>1</sup>University of Delaware, Department of Physical Therapy, Newark, DE, USA

<sup>2</sup>University of Delaware, Biomechanics and Movement Science Program, Newark, DE, USA

<sup>3</sup>University of Delaware, Biostatistics Core, Newark, DE, USA

<sup>4</sup>Washington University School of Medicine in St. Louis, Program of Physical Therapy, St. Louis, MO, USA

**Corresponding Author:**

Darcy S. Reisman, PT, PhD, FAPTA

Department of Physical Therapy, College Health Science, University of Delaware, Newark DE.

540 South College Avenue

Newark, DE 19713, USA

Phone: (302) 831-7422

Email: [dreisman@udel.edu](mailto:dreisman@udel.edu)

**Manuscript Word Count:** 5812 words

## ABSTRACT

**Background:** Individualizing interventions is imperative to optimize physical activity in people with chronic stroke. This secondary analysis grouped individuals with chronic stroke into clinical profiles based on baseline characteristics and examined if these clinical profiles preferentially benefitted from a specific rehabilitation intervention to improve daily step-activity.

**Methods:** Participants had non-cerebellar strokes  $\geq 6$  months prior to enrollment, were 21-85 years old, had walking speeds of 0.3-1.0 m/s, and took  $< 8,000$  steps-per-day. Participants were randomized to 1 of 3 interventions: high-intensity treadmill training (FAST), a step-activity behavioral intervention (SAM), or a combined intervention (FAST+SAM). The primary outcome was the interaction of latent class (clinical profile) and intervention group (FAST, SAM, FAST+SAM) on a change in steps-per-day. Key clinical characteristics to identify the latent classes included walking speed, walking endurance, balance self-efficacy, cognition, and area deprivation.

**Results:** Of the 190 participants with complete pre- and post-intervention data (mean [SD] age, 64 [12] years; 93 females [48.9%]), 3 distinct profiles of people with chronic stroke were identified. Within our sample, class 1 had the lowest walking capacity (speed and endurance), lowest balance self-efficacy, and highest area deprivation, and had the greatest change in step-activity when enrolled in the SAM (mean[95%CI], 1624 [426 – 2821]) or FAST+SAM (1150 [723 – 1577]) intervention. Class 2 had walking capacity, baseline steps-per-day, and self-efficacy values between Class 1 and 3, and had the greatest change in step-activity when enrolled in the SAM (2002 [1193–2811]) intervention. Class 3 had the highest walking capacity, highest self-efficacy, and lowest

area deprivation and the greatest change in step-activity when enrolled in the FAST+SAM (1532 [915–2150]) intervention.

**Conclusions:** People with chronic stroke require different interventions to optimize a change in step-activity. Clinicians can use clinically relevant measures to personalize intervention selection to augment step-activity in people with chronic stroke.

**Trial Registration:** NCT02835313; <https://clinicaltrials.gov/ct2/show/NCT02835313>

**Keywords:** stroke, walking, step-activity monitoring, physical activity, high-intensity gait

## 60 **NON-STANDARD ABBREVIATIONS AND ACRONYMS**

61 **6MWT** – Six-Minute Walk Test

62 **ABC** – Activities-specific Balance Confidence scale

63 **ADI** - Area Deprivation Index

64 **AIC** - Akaike's Information criterion

65 **BIC** - Bayesian Information Criterion

66 **CCI** - Charlson Co-morbidity Index

67 **FAST** – high-intensity treadmill training

68 **LMR-adjusted** - Lo-Mendell-Rubin adjusted likelihood ratio test

69 **LVMM** – Latent Variable Mixture Model

70 **MoCA** - Montreal Cognitive Assessment

71 **PHQ-9** - Patient Health Questionnaire-9

72 **POST**- after intervention

73 **PRE** – before randomization

74 **PROWALKS** – Promoting Recovery Optimization with Walking Exercise After Stoke

75 **SAM** – step-activity behavioral intervention

76 **SSWS** – self-selected walking speed

77 **VLMR** - Vuong-Lo-Mendell-Rubin likelihood ratio test

## INTRODUCTION

People with chronic stroke average only 4,000 steps-per-day and rarely meet exercise and physical activity recommendations.<sup>1,2</sup> This profound inactivity increases the risks of secondary stroke and more severe stroke-related disability.<sup>3,4</sup> Recent research indicates if people with chronic stroke receive a behavioral intervention with step-activity monitoring, with or without a concurrent high-intensity walking training, there is a significant increase in their daily step-activity.<sup>5,6</sup>

The Promoting Recovery Optimization of Walking Activity in Stroke (PROWALKS; NCT02835313) randomized clinical trial aimed to improve daily step-activity in people with chronic stroke.<sup>5</sup> Participants across 4 sites were randomized to 1 of 3 intervention groups where training sessions focused on either (1) a behavioral intervention to improve daily step-activity, (2) a high-intensity treadmill walking intervention to improve walking capacity, or (3) a combined intervention which included both the behavioral and high-intensity treadmill walking interventions.<sup>5,7</sup> While there were significant differences in the change in daily step-activity observed between intervention groups, there was broad variability within each intervention group. These results indicate certain individuals may respond more favorably to one intervention over another.

To reduce the well-documented negative consequences of low levels of physical activity after stroke, improvements in the efficacy of interventions aimed at increasing daily step-activity are needed. As in other areas of medical care today,<sup>8-10</sup> matching individual characteristics with specific interventions - in essence providing precision rehabilitation - is likely needed for optimal efficacy. Cross-sectional work has previously identified key characteristics which subgroup people with chronic stroke into distinct

classes and are related to their baseline daily step-activity.<sup>11</sup> However, it remains unknown if these characteristics are also important when examining the response of people with stroke after undergoing interventions targeting a *change* in daily step-activity.

Therefore, the purpose of this secondary analysis from a large rehabilitation randomized clinical trial was to determine if latent classes of people with chronic stroke differ on which intervention leads to the most robust change in daily step-activity. We hypothesized (1) latent classes of people with chronic stroke would differ on measures of baseline walking capacity, psychosocial factors, cognition, and environmental factors and (2) classes (e.g., clinical profiles) would differ on which intervention demonstrates the greatest change in daily stepping activity.

## **METHODS**

### **Participants**

This is a secondary analysis of the multisite PROWALKS randomized controlled trial. Full details of the study protocol and primary analyses have previously been reported.<sup>5,7</sup> Briefly, 250 participants aged 21-85 and in the chronic stroke (> 6 months) phase were randomized. Participants had to be able to walk without assistance of another person at speeds of 0.3-1.0m/s and have less than 8,000 steps-per-day at baseline.<sup>7</sup> This analysis includes all participants ( $n = 190$ ) with complete clinical evaluation and step-activity data at the pre- and post-intervention timepoints. Table 1 displays demographic information. The parent RCT was approved by the University of Delaware, University of Pennsylvania, Indiana University and Christiana Care Hospitals

Institutional Review Boards and all participants gave written informed consent. This study is reported according to CONSORT guidelines.

## **Interventions**

Participants were randomized to one of three intervention groups: high-intensity treadmill walking (FAST), step-activity monitoring (SAM), or a high-intensity treadmill walking and step-activity monitoring combined intervention (FAST+SAM).<sup>5,7</sup> For this analysis, 65 participants were in the FAST intervention, 65 participants were in the SAM intervention, and 60 participants were in the FAST+SAM intervention. The attendance goal for all groups was up to 36 sessions (~3x/week for 12 weeks).<sup>5,7</sup> The FAST intervention targeted changes in walking capacity, which is defined as what someone *can do* as measured in a structured environment such as a clinic or laboratory, and is often quantified as walking speed and walking endurance.<sup>12</sup> Briefly, the FAST intervention had a goal of accumulating as many minutes as possible (maximum 30 minutes/session) of treadmill walking at or above 70% of their heart rate reserve. The SAM intervention used motivational interviewing techniques and individualized goal setting to target progressive increases in daily step-activity. The FAST+SAM group received both interventions simultaneously across the intervention period, thereby receiving a combined intervention targeting both improvements in walking capacity and daily step-activity. As previously reported, intervention groups did not differ on any training fidelity metrics.<sup>5</sup>

## **Step-activity Monitoring**

At the pre- and post-intervention clinical evaluations, all participants were provided with a Fitbit One or Zip device (Google; San Francisco, CA) to wear on their

non-paretic ankle for 7 full days. These devices are valid and reliable to quantify step-activity in people with chronic stroke.<sup>13-16</sup> Participants were instructed to wear the device during all waking hours and to go about their normal daily activities.<sup>7</sup> Prior to enrollment, participants were required to have a minimum of 3 valid days of step-activity. For each participant, all days of step-activity were assessed to ensure consistent individual patterns of wear time. Prior to analysis data was downloaded from the Fitabase platform.

## Measures

Eight variables, encompassing multiple domains, were identified for inclusion as they might impact which intervention an individual may preferentially benefit from to improve their step-activity. These selected variables have previously been found to distinguish latent classes within the chronic stroke population and were important predictors of cross-sectional step-activity.<sup>11</sup> These clinically relevant variables were used in a latent variable mixture model to identify latent classes of people with stroke. All variables were collected during the pre-intervention clinical evaluation.

## Walking Capacity

Self-selected walking speed (SSWS) and the Six-Minute Walk Test (6MWT) are recommended measures with strong psychometric properties to quantify walking speed and endurance in people with stroke.<sup>17-19</sup> The 10-meter walk test quantifies walking speed over a short distance.<sup>19</sup> The 6MWT quantifies a person's capacity to walk for longer periods of time and is the strongest measure to distinguish home versus community ambulators in people with stroke.<sup>20</sup>

## Psychosocial Factors



The Activities-specific Balance Confidence (ABC) scale and Patient Health Questionnaire-9 (PHQ-9) are valid measures in people with stroke and represent balance self-efficacy and depressive symptoms, respectively.<sup>21,22</sup>

## **Physical Health and Cognition**

The Charlson Co-morbidity Index (CCI) is a 16-item self-report questionnaire used to quantify comorbidity burden by weighting factors based on disease severity.<sup>23,24</sup> The Montreal Cognitive Assessment (MoCA) provides a global assessment of overall cognition.<sup>25</sup>

## **Environmental Factors**

The Area Deprivation Index (ADI) uses an individual's zip code to provide a national percentile ranking (1-100; higher = more disadvantage) of neighborhood socioeconomic disadvantage. The Walk Score represents the walkability of neighborhoods (0-100; higher = greater walkability) and is based on the number of amenities within walking distance from a given location.<sup>26,27</sup>

## **Statistical Analyses**

Latent Variable Mixture Modeling (LVMM) is a special case of Structural Equation Modeling which uses observed variables, called indicators, to identify homogeneous classes within a heterogeneous population.<sup>28</sup> The data-driven approach of LVMM allows the sample to be grouped into latent classes based on similar patterns among indicator variables in the model. A combination of multiple objective criteria was used to determine the optimal number of classes including Akaike's Information criterion (AIC), Bayesian Information Criterion (BIC), sample-size adjusted BIC, and Entropy. The Vuong-Lo-Mendell-Rubin likelihood ratio test (VLMR) and Lo-Mendell-Rubin adjusted

likelihood ratio test (LMR-adjusted) were used to determine if a model with  $k$  number of classes better fit the data than a model with  $k - 1$  classes.<sup>29</sup>

Once the optimal number of classes was determined, participants were assigned to the class of their highest posterior probability.<sup>28</sup> A higher posterior probability (values range 0-1) indicates more similarity to other individuals within that class. General Linear Models were used to compare classes on the eight indicator variables used in the LVMM. Classes were also compared on demographic characteristics (age, sex, stroke chronicity), intervention group, and baseline steps-per-day. A GLM with robust errors was used to compare the pre- to post-intervention change in daily step-activity. Fixed effects included the main effects of class and intervention group (FAST, SAM, or FAST+SAM) and their interaction. The LVMM analysis was conducted in Mplus (Muthén and Muthén, version 8.10),<sup>30</sup> and subsequent class comparisons were conducted in SPSS (version 29.0). For all analyses,  $p < 0.05$  was considered statistically significant. The senior author (D.R.) has full access to all the data in the study and takes responsibility for its integrity and the data analysis.

## RESULTS

The 190 participants with full pre- and post-intervention step-activity data were included in the LVMM. Models with 2-5 latent classes were examined and fit criteria indicated an optimal fit of 3 classes (Table 2). In this final 3-class model, class 1 had 47 individuals, class 2 had 62 individuals, and class 3 had 81 individuals. Classes 1-3 had an average latent class probability of 0.946, 0.957, and 0.920, respectively.

Of the eight variables entered in the model (Table 3), there were significant differences among all classes in the 6MWT (mean [95% CI]; class 1, 148m [135-160];

class 2, 275m [264-410]; class 3, 397m [384-410];  $p < .001$ ) and SSWS (.42m/s [.40-.45]; class 2, .67m/s [.65-.70]; class 3, .91m/s [.89-.93];  $p < .001$ ) with class 1 demonstrating the least distance covered on the 6MWT (lowest walking endurance) and the slowest gait speed and class 3 demonstrating the highest walking endurance and fastest gait speed. There were significant differences between classes 1 vs. 3 and 2 vs. 3 in measures of cognition (MoCA; class 1, 23 [22-24]; class 2, 22 [21-24]; class 3, 25 [24-26];  $p < .001$ ) and balance self-efficacy (ABC (%); class 1, 66 [61-72]; class 2, 72 [68-76]; class 3, 81 [78-85];  $p < .001$ ) with classes 1 and 2 having lower cognition and balance self-efficacy than class 3. Lastly, there was a significant difference between class 1 vs. 3 in area deprivation (ADI (%); class 1, 47 [39-54]; class 2, 39 [33-44]; class 3, 34 [29-38];  $p = .014$ ), with class 1 having higher deprivation than class 3. There were no significant differences among classes in depressive symptoms (PHQ-9; class 1, 3.5 [2.3-4.6]; class 2, 4.1 [3.2-5.0]; class 3, 4.1 [3.3-5.0])  $p = .600$ , comorbidity burden (CCI; class 1, 3.7 [3.2-4.2]; class 2, 3.4 [2.9-3.9]; class 3, 3.1 [2.6-3.6];  $p = .188$ ), or Walk Score (class 1, 33.6 [26.1-41.1]; class 2, 31.8 [25.4-38.2]; class 3, 25.9 [20.5-31.3];  $p = .185$ ).

There were no significant differences among all classes on age (years; class 1, 63.6 [59.9-67.2]; class 2, 64.3 [61.2-67.5]; class 3, 63.5 [61.0-65.9],  $p = .905$ ), sex ( $n$  female (%); class 1, 22 (46.8); class 2, 36 (58.1); class 3, 35 (43.2);  $p > .200$ ), stroke chronicity (months; class 1, 36.1 [26.1-46.2]; class 2, 62.8 [41.2-84.4]; class 3, 41.7 [29.0-54.4];  $p = .066$ ), or intervention group ( $n$  (%); class 1, FAST, 16 (34.0), SAM, 12 (25.5), FAST+SAM, 19 (40.4); class 2, FAST, 18 (29.0), SAM, 24 (38.7), FAST+SAM, 20 (23.3); class 3, FAST, 31 (38.3), SAM, 29 (35.8), FAST+SAM, 21 (25.9);  $p = .363$ ). All

classes significantly differed on baseline step-activity (steps-per-day; class 1, 2095 [1636-2554]; class 2, 3792 [3373-4211]; class 3, 4850 [4522-5178];  $p < .001$ ). Class 1 demonstrated the lowest baseline steps-per-day with class 3 demonstrating the highest baseline steps-per-day.

There was a significant class by intervention group interaction ( $p = .016$ ) in the change in steps-per-day from pre- to post-intervention (Table 4). For clarity, results are outlined by class in the paragraphs below.

For class 1, participants had the greatest change in step-activity if enrolled in the SAM or FAST+SAM intervention, increasing their daily steps on average by 1,624 (SE, 611) and 1,150 (218) steps, respectively (Table 4). There was no significant difference between SAM or FAST+SAM (mean difference, [95% CI]; 473 [-798-1745];  $p = .466$ ; Table 4). When compared to participants in class 1 enrolled in FAST (314 (192)), participants in SAM took 1,309 more steps-per-day (95% CI [54-2565];  $p = .041$ ) and participants in FAST+SAM took 836 more steps-per-day (95% CI [266-1406];  $p = .004$ ; Table 4).

For class 2, participants had the greatest change in step-activity when enrolled in the SAM intervention, increasing their average daily step-activity by 2,002 (413) steps (Table 4). This was an increase of 2,221 more steps than class 2 participants enrolled in FAST (95% CI [1283-3159];  $p < .001$ ) and 1,135 more steps than class 2 participants enrolled in the FAST+SAM (95% CI [196-2074];  $p = .018$ ; Table 4) intervention. Within class 2, participants enrolled in the FAST+SAM intervention increased their step-activity by 1,086 more steps-per-day than those in the FAST intervention (95% CI [414-1758];  $p = .002$ ; Table 4).

For class 3, participants had the greatest change in step-activity when enrolled in the FAST+SAM intervention, increasing their average steps by 1,532 (315) steps-per-day (Table 4). This was an increase of 1,142 more steps-per-day than class 3 participants enrolled in the FAST intervention (95% CI [246-2039];  $p = .013$ ) and 872 more steps-per-day than those in SAM intervention (95% CI [14-1729];  $p = .046$ ; Table 4). For class 3, there was no significant difference in change in daily steps between those enrolled in the FAST intervention versus the SAM intervention (95% CI [-1152-611];  $p = .547$ ; Table 4).

## DISCUSSION

The results of this study demonstrate that the individual characteristics of a person with chronic stroke can be utilized to determine which rehabilitation intervention will optimally improve their daily step-activity. Using a data-driven statistical method, we identified three distinct classes, or clinical profiles, of people with chronic stroke who differed on measures of walking capacity (speed and endurance), balance self-efficacy, area deprivation, cognition, and baseline step-activity. In line with our hypothesis, we found that these clinical profiles of people with chronic stroke - with different baseline characteristics - show greater changes in daily step-activity following certain interventions. Based on these results, clinicians can use simple, clinically available measures in their own clinical evaluations to guide intervention selection to optimally improve daily step-activity in people with chronic stroke.

The clinical profile of Class 1 was characterized by the individuals in our sample with the lowest walking capacity (speed and endurance), balance self-efficacy, cognition, and baseline step-activity, and the highest area deprivation. This clinical

profile had the greatest change in step-activity when enrolled in the SAM or FAST+SAM intervention, indicating a targeted behavioral intervention - with or without a simultaneous walking capacity intervention - will result in the greatest change in their daily step-activity. This finding aligns with preliminary work in a small sample of people with chronic stroke that found those with below average walking endurance and step-activity responded most favorably to an intervention targeting both step-activity and walking capacity (e.g., FAST+SAM).<sup>31</sup> The primary PROWALKS results found the FAST+SAM and SAM interventions demonstrated similar changes in steps-per-day.<sup>5</sup> However, when comparing these two interventions, only the FAST+SAM intervention had clinically meaningful improvements in walking capacity.<sup>5</sup> Combined, these results suggest when people with chronic stroke have low walking capacity – such as those in class 1 – combining a behavioral intervention with a high-intensity walking training intervention may be optimal to maximize changes in both steps-per-day and walking capacity.

The class 2 clinical profile encompassed individuals with values of walking capacity, baseline step-activity, cognition, balance self-efficacy, and area deprivation that fell between classes 1 and 3. This clinical profile had the most robust response in daily step-activity when enrolled in the SAM intervention, exceeding a change of 2000 steps-per-day. Notably for this class, the changes in steps-per-day for those in the FAST+SAM intervention was less than one-half of the change observed in the SAM intervention. Furthermore, the change in steps-per-day when enrolled in FAST+SAM was less than 1000 steps-per-day, which may be an important threshold in step-activity changes (see below). This suggests that when people with chronic stroke have levels of

walking capacity and baseline step-activity similar to class 2, a behavioral intervention alone may be *most effective* for improving daily step-activity.

Class 3 was defined by the people with stroke in our sample with the highest walking capacity (speed and endurance), balance self-efficacy, cognition, and baseline step-activity, and lowest area deprivation. This clinical profile had the greatest change in step-activity when enrolled in the FAST+SAM intervention. This indicates that for this group, a behavioral intervention alone *is not* as effective to improve step-activity as when it is paired with an intervention targeting improvements in walking capacity. In fact, for individuals in class 3, the SAM intervention alone resulted in only 40% of the change in steps-per-day as seen in the FAST+SAM intervention (mean difference [95% CI], 872 [14 -1729]). The change in steps-per-day when enrolled in the FAST+SAM intervention well exceeded a 1,000-step change (see below) while the SAM intervention fell below this threshold. This suggests that for class 3, optimal changes to step-activity will likely occur when participating in a combined behavioral change and walking capacity building intervention.

For all classes, the FAST intervention – which used high-intensity walking training to target changes in walking capacity – demonstrated the smallest changes in daily step-activity. This mirrors the primary PROWALKS results in which participants randomized to the FAST intervention were the only intervention group which did not have a significant increase in steps-per-day.<sup>5</sup> Thus, the results for the individual classes, in which the FAST intervention had the smallest change in step-activity, may appear self-evident, but that may not have necessarily been the case. It may have been that while the FAST intervention did not result in a significant change in steps-per-day for the

entire sample, it could have been better for individuals with a certain clinical profile. As this result did not occur, it further reinforces the primary PROWALKS results, and other studies, which demonstrate that interventions primarily targeting changes in walking capacity will have minimal impact on daily step-activity.<sup>5,32,33</sup>

Notably, the step-activity behavioral intervention delivered either independently (SAM) or in combination with a high-intensity walking intervention (FAST+SAM) was required have the most robust change in daily step-activity. While there is no known change in step-activity defined as “clinically meaningful”, a 1,000 steps-per-day threshold has previously been found to decrease all-cause mortality risk by 15%.<sup>34</sup> When considering the *optimal class and intervention group pairings* identified above (Class 1 = SAM or FAST+SAM; Class 2 = SAM; Class 3 = FAST+SAM), all pairings surpassed a change of at least 1,000 steps-per-day. In contrast, no other class and intervention group pairing (e.g., class 2 participants enrolled in FAST+SAM) reached this 1,000-step change. This evidence emphasizes that using baseline personal characteristics to guide intervention selection can better optimize meaningful changes in step-activity outcomes.

The present results confirm previous cross-sectional work in people with stroke that identified similar key variables which distinguished classes of people with stroke.<sup>6,11,35,36</sup> Collectively, these results emphasize the importance of walking speed and endurance, balance self-efficacy, cognition, and area deprivation on influencing both baseline step-activity *and* a change in steps-per-day following targeted interventions in people with chronic stroke.<sup>11,35</sup> Of note, all key variables identified in this



analysis could be collected within a clinical setting, increasing the ease of implementing these findings.

## Limitations

This secondary analysis was limited to the measures collected by the parent randomized clinical trial. Despite these measures often being used, and/or recommended to be used, in rehabilitation settings, alternative measures could impact or alter the results. While this analysis was able to identify three distinct clinical profiles of people with chronic stroke, the results are still restricted to the participants included in the parent randomized clinical trial. It could be tempting to think of the three clinical profiles in this analysis as those with “high”, “average”, or “low” walking capacity, self-efficacy, and baseline steps-per-day. However, it is important to note that these descriptors are only applicable within the sample of people tested which included individuals with chronic stroke with a self-selected walking speed between 0.3-1.0 m/s and with less than 8,000 steps-per-day. It is unclear how these results would generalize to people with chronic stroke with gait speeds below 0.3 m/s or above 1.0 m/s, and/or to individuals who require physical assistance from another individual to walk or walk more than 8,000 steps/day. Therefore, results of this study are unable to determine of what is considered “low” or “high”, rather can only recommend the most robust intervention to improve steps-per-day for individuals who most similarly match the clinical profiles uncovered.

## Conclusions

The results of this analysis provide rehabilitation clinicians with key clinical characteristics which can guide intervention selection to have the most robust change in

375 steps-per-day in people with chronic stroke. Optimizing intervention selection by  
376 personalizing it to each patient has the potential to significantly reduce the levels of  
377 physical inactivity, and the secondary health consequences of it, in people with chronic  
378 stroke. There is a known reduction in physical activity in people with stroke, and ample  
379 evidence on the risks of such inactivity, making it critical to understand which  
380 interventions can most optimally improve post-stroke walking activity. The results of this  
381 analysis provide clear guidance on what intervention should be selected to improve  
382 step-activity based on the clinical profile of the person. Providing such individualized  
383 interventions will likely improve the efficacy of rehabilitation care.

**Acknowledgements:** The authors would like to acknowledge Henry Wright and Tamara Wright for their significant contributions in subject recruitment, data collections, and data cleaning.

**Funding:** This work was primarily funded by NIH/NICHD - Promoting Recovery Optimization with WALKing Exercise after Stroke (PROWALKS), 1R01HD086362; NIH/NICHD – Predoctoral Training in Physical Therapy and Rehabilitation Research, T32HD007490; This research has been supported in full or part from the Foundation for Physical Therapy Research; NIH NICHD/NCMRR R25HD105583 – Reproducible Rehabilitation Research Educational Program. The funding sources played no role in study design, execution, administration, or dissemination.

**Disclosures:** None.

1. Fini NA, Holland AE, Keating J, Simek J, Bernhardt J. How Physically Active Are People Following Stroke? Systematic Review and Quantitative Synthesis. *Phys Ther*. 2017;97:707-717. doi: 10.1093/ptj/pzx038
2. Moore SA, Boyne P, Fulk G, Verheyden G, Fini NA. Walk the Talk: Current Evidence for Walking Recovery After Stroke, Future Pathways and a Mission for Research and Clinical Practice. *Stroke*. 2022;53:3494-3505. doi: 10.1161/strokeaha.122.038956
3. Girotra T, Lekoubou A, Bishu KG, Ovbiagele B. A contemporary and comprehensive analysis of the costs of stroke in the United States. *J Neurol Sci*. 2020;410:116643. doi: 10.1016/j.jns.2019.116643
4. Tsao CW, Aday AW, Almarzooq ZI, Alonso A, Beaton AZ, Bittencourt MS, Boehme AK, Buxton AE, Carson AP, Commodore-Mensah Y, et al. Heart Disease and Stroke Statistics-2022 Update: A Report From the American Heart Association. *Circulation*. 2022;145:e153-e639. doi: 10.1161/cir.0000000000001052
5. Thompson ED, Pohlig RT, McCartney KM, Hornby TG, Kasner SE, Raser-Schramm J, Miller AE, Henderson CE, Wright H, Wright T, et al. Increasing Activity After Stroke: A Randomized Controlled Trial of High-Intensity Walking and Step Activity Intervention. *Stroke*. 2024;55:5-13. doi: 10.1161/strokeaha.123.044596
6. Danks KA, Pohlig RT, Roos M, Wright TR, Reisman DS. Relationship Between Walking Capacity, Biopsychosocial Factors, Self-efficacy, and Walking Activity in Persons Poststroke. *J Neurol Phys Ther*. 2016;40:232-238. doi: 10.1097/npt.0000000000000143
7. Wright H, Wright T, Pohlig RT, Kasner SE, Raser-Schramm J, Reisman D. Protocol for promoting recovery optimization of walking activity in stroke (PROWALKS): a randomized controlled trial. *BMC Neurol*. 2018;18:39. doi: 10.1186/s12883-018-1044-1
8. Sicklick JK, Kato S, Okamura R, Schwaederle M, Hahn ME, Williams CB, De P, Krie A, Piccioni DE, Miller VA, et al. Molecular profiling of cancer patients enables personalized combination therapy: the I-PREDICT study. *Nat Med*. 2019;25:744-750. doi: 10.1038/s41591-019-0407-5
9. Schoenthaler A, Leon M, Butler M, Steinhäuser K, Wardzinski W. Development and Evaluation of a Tailored Mobile Health Intervention to Improve Medication Adherence in Black Patients With Uncontrolled Hypertension and Type 2 Diabetes: Pilot Randomized Feasibility Trial. *JMIR Mhealth Uhealth*. 2020;8:e17135. doi: 10.2196/17135
10. Krzyszczyk P, Acevedo A, Davidoff EJ, Timmins LM, Marrero-Berrios I, Patel M, White C, Lowe C, Sherba JJ, Hartmanshenn C, et al. The growing role of precision and personalized medicine for cancer treatment. *TECHNOLOGY*. 2018;06:79-100. doi: 10.1142/s2339547818300020
11. Miller A, Pohlig RT, Wright T, Kim HE, Reisman DS. Beyond Physical Capacity: Factors Associated With Real-world Walking Activity After Stroke. *Arch Phys Med Rehabil*. 2021;102:1880-1887.e1881. doi: 10.1016/j.apmr.2021.03.023
12. Lang CE, Holleran CL, Strube MJ, Ellis TD, Newman CA, Fahey M, DeAngelis TR, Nordahl TJ, Reisman DS, Earhart GM, et al. Improvement in the Capacity for Activity Versus Improvement in Performance of Activity in Daily Life During Outpatient Rehabilitation. *Journal of Neurologic Physical Therapy*. 2023;47:16-25. doi: 10.1097/npt.0000000000000413

- 441 13. Schaffer SD, Holzapfel SD, Fulk G, Bosch PR. Step count accuracy and reliability of two  
442 activity tracking devices in people after stroke. *Physiother Theory Pract.* 2017;33:788-  
443 796. doi: 10.1080/09593985.2017.1354412
- 444 14. Duclos NC, Aguiar LT, Aissaoui R, Faria C, Nadeau S, Duclos C. Activity Monitor Placed at  
445 the Nonparetic Ankle Is Accurate in Measuring Step Counts During Community Walking  
446 in Poststroke Individuals: A Validation Study. *Pm r.* 2019;11:963-971. doi:  
447 10.1002/pmrj.12080
- 448 15. Klassen TD, Simpson LA, Lim SB, Louie DR, Parappilly B, Sakakibara BM, Zbogor D, Eng JJ.  
449 "Stepping Up" Activity Poststroke: Ankle-Positioned Accelerometer Can Accurately  
450 Record Steps During Slow Walking. *Phys Ther.* 2016;96:355-360. doi:  
451 10.2522/ptj.20140611
- 452 16. Hui J, Heyden R, Bao T, Accettone N, McBay C, Richardson J, Tang A. Validity of the Fitbit  
453 One for Measuring Activity in Community-Dwelling Stroke Survivors. *Physiother Can.*  
454 2018;70:81-89. doi: 10.3138/ptc.2016-40.ep
- 455 17. Sullivan JE, Crouner BE, Kluding PM, Nichols D, Rose DK, Yoshida R, Pinto Zipp G.  
456 Outcome measures for individuals with stroke: process and recommendations from the  
457 American Physical Therapy Association neurology section task force. *Phys Ther.*  
458 2013;93:1383-1396. doi: 10.2522/ptj.20120492
- 459 18. Flansbjer UB, Holmbäck AM, Downham D, Patten C, Lexell J. Reliability of gait  
460 performance tests in men and women with hemiparesis after stroke. *J Rehabil Med.*  
461 2005;37:75-82. doi: 10.1080/16501970410017215
- 462 19. Moore JL, Potter K, Blankshain K, Kaplan SL, O'Dwyer LC, Sullivan JE. A Core Set of  
463 Outcome Measures for Adults With Neurologic Conditions Undergoing Rehabilitation: A  
464 CLINICAL PRACTICE GUIDELINE. *Journal of Neurologic Physical Therapy.* 2018;42:174-  
465 220. doi: 10.1097/npt.0000000000000229
- 466 20. Fulk GD, He Y, Boyne P, Dunning K. Predicting Home and Community Walking Activity  
467 Poststroke. *Stroke.* 2017;48:406-411. doi: 10.1161/strokeaha.116.015309
- 468 21. Salbach NM, Mayo NE, Hanley JA, Richards CL, Wood-Dauphinee S. Psychometric  
469 evaluation of the original and Canadian French version of the activities-specific balance  
470 confidence scale among people with stroke. *Arch Phys Med Rehabil.* 2006;87:1597-1604.  
471 doi: 10.1016/j.apmr.2006.08.336
- 472 22. de Man-van Ginkel JM, Gooskens F, Schepers VP, Schuurmans MJ, Lindeman E,  
473 Hafsteinsdóttir TB. Screening for poststroke depression using the patient health  
474 questionnaire. *Nurs Res.* 2012;61:333-341. doi: 10.1097/NNR.0b013e31825d9e9e
- 475 23. D'Hoore W, Sicotte C, Tilquin C. Risk adjustment in outcome assessment: the Charlson  
476 comorbidity index. *Methods Inf Med.* 1993;32:382-387.
- 477 24. Charlson ME, Pompei P, Ales KL, MacKenzie CR. A new method of classifying prognostic  
478 comorbidity in longitudinal studies: Development and validation. *Journal of Chronic*  
479 *Diseases.* 1987;40:373-383. doi: [https://doi.org/10.1016/0021-9681\(87\)90171-8](https://doi.org/10.1016/0021-9681(87)90171-8)
- 480 25. Pendlebury ST, Mariz J, Bull L, Mehta Z, Rothwell PM. MoCA, ACE-R, and MMSE versus  
481 the National Institute of Neurological Disorders and Stroke-Canadian Stroke Network  
482 Vascular Cognitive Impairment Harmonization Standards Neuropsychological Battery  
483 after TIA and stroke. *Stroke.* 2012;43:464-469. doi: 10.1161/strokeaha.111.633586

26. Carr LJ, Dunsiger SI, Marcus BH. Validation of Walk Score for estimating access to walkable amenities. *Br J Sports Med*. 2011;45:1144-1148. doi: 10.1136/bjsm.2009.069609
27. Duncan DT, Aldstadt J, Whalen J, Melly SJ, Gortmaker SL. Validation of walk score for estimating neighborhood walkability: an analysis of four US metropolitan areas. *Int J Environ Res Public Health*. 2011;8:4160-4179. doi: 10.3390/ijerph8114160
28. Lubke GH, Luningham J. Fitting latent variable mixture models. *Behaviour research and therapy*. 2017;98:91-102. doi: 10.1016/j.brat.2017.04.003
29. Weller BE, Bowen NK, Faubert SJ. Latent Class Analysis: A Guide to Best Practice. *Journal of Black Psychology*. 2020;46:287-311. doi: 10.1177/0095798420930932
30. Muthen LK, Muthen B, Muthén, . M. *Mplus Version 8 User's Guide*. Muthen & Muthen; 2017.
31. Danks KA, Pohlig R, Reisman DS. Combining Fast-Walking Training and a Step Activity Monitoring Program to Improve Daily Walking Activity After Stroke: A Preliminary Study. *Arch Phys Med Rehabil*. 2016;97:S185-193. doi: 10.1016/j.apmr.2016.01.039
32. Hornby TG, Plawecki A, Lotter JK, Scofield ME, Lucas E, Henderson CE. Gains in Daily Stepping Activity in People With Chronic Stroke After High-Intensity Gait Training in Variable Contexts. *Physical Therapy*. 2022;102. doi: 10.1093/ptj/pzac073
33. Michael K, Goldberg AP, Treuth MS, Beans J, Normandt P, Macko RF. Progressive Adaptive Physical Activity in Stroke Improves Balance, Gait, and Fitness: Preliminary Results. *Topics in Stroke Rehabilitation*. 2009;16:133-139. doi: 10.1310/tsr1602-133
34. Banach M, Lewek J, Surma S, Penson PE, Sahebkar A, Martin SS, Bajraktari G, Henein MY, Reiner Ž, Bielecka-Dąbrowa A, et al. The association between daily step count and all-cause and cardiovascular mortality: a meta-analysis. *Eur J Prev Cardiol*. 2023;30:1975-1985. doi: 10.1093/eurjpc/zwad229
35. Miller A, Pohlig RT, Reisman DS. Social and physical environmental factors in daily stepping activity in those with chronic stroke. *Topics in stroke rehabilitation*. 2021;28:161-169. doi: 10.1080/10749357.2020.1803571
36. Thilarajah S, Mentiplay BF, Bower KJ, Tan D, Pua YH, Williams G, Koh G, Clark RA. Factors Associated With Post-Stroke Physical Activity: A Systematic Review and Meta-Analysis. *Arch Phys Med Rehabil*. 2018;99:1876-1889. doi: 10.1016/j.apmr.2017.09.117

**Table 1: Participant Characteristics**

| Measure                           | Participants ( <i>n</i> = 190) |
|-----------------------------------|--------------------------------|
| Age (y)                           | 63.8 (12.2)                    |
| Sex, No. (% F)                    | 93 (48.9)                      |
| Time Since Stroke (mo)            | 47.2 (66.0)                    |
| Assistive Device Use, No. (% yes) | 94 (49.5)                      |
| Orthotic Device Use, No. (% yes)  | 51 (26.8)                      |
| Self-selected Walking Speed (m/s) | 0.71 (0.2)                     |
| Baseline steps-per-day            | 3823 (1933)                    |

*Data presented as mean (standard deviation) or n (%).*

**Table 2: Model Fit Criteria for models with 2 through 5 latent classes**

| # of Classes | AIC                           | BIC      | Sample-Adjusted-BIC | Entropy | VLMR      | VLMR <i>p</i> value | LMR-Adjusted | LMR-Adjusted <i>p</i> value |
|--------------|-------------------------------|----------|---------------------|---------|-----------|---------------------|--------------|-----------------------------|
| 2            | 8905.916                      | 8987.092 | 8907.902            | 0.855   | -4542.537 | < 0.001             | 224.405      | < 0.001                     |
| 3            | 8836.118                      | 8946.516 | 8838.819            | 0.872   | -4427.958 | 0.0075              | 85.978       | 0.0084                      |
| 4            | 8802.562                      | 8942.184 | 8805.978            | 0.888   | -4384.059 | 0.1111              | 50.487       | 0.1153                      |
| 5            | Model did not fully converge. |          |                     |         |           |                     |              |                             |

*AIC = Akaike's Information Criterion, BIC = Bayesian Information Criterion, VLMR = Vuong-Lo-Mendell-Rubin likelihood ratio test, LMR-adjusted = Lo-Mendell-Rubin adjusted likelihood ratio test*



**Table 3: Differences between key variables among latent classes**

| Measure                                                                            | Class 1 (n = 47) | Class 2 (n = 62) | Class 3 (n = 81) | p-value |
|------------------------------------------------------------------------------------|------------------|------------------|------------------|---------|
| <b>Variables Used in the Latent Variable Mixture Model to define the Classes</b>   |                  |                  |                  |         |
| <b>6MWT (m)<sup>a</sup></b>                                                        | 148 (135-160)    | 275 (264-410)    | 397 (384-410)    | <.001   |
| <b>SSWS (m/s)<sup>a</sup></b>                                                      | .42 (.40-.45)    | .67 (.65-.70)    | 0.91 (.89-.93)   | <.001   |
| <b>MoCA<sup>b</sup></b>                                                            | 23 (22-24)       | 22 (21-24)       | 25 (24-26)       | <.001   |
| <b>ABC (%)<sup>b</sup></b>                                                         | 66 (61-72)       | 72 (68-76)       | 81 (78-85)       | <.001   |
| <b>PHQ9</b>                                                                        | 3.5 (2.3-4.6)    | 4.1 (3.2-5.0)    | 4.1 (3.3-5.0)    | .600    |
| <b>CCI</b>                                                                         | 3.7 (3.2-4.2)    | 3.4 (2.9-3.9)    | 3.1 (2.6-3.6)    | .188    |
| <b>ADI (%)<sup>c</sup></b>                                                         | 46.8 (3.9)       | 38.6 (2.8)       | 33.6 (2.4)       | .014    |
| <b>Walk Score</b>                                                                  | 34 (26-41)       | 32 (25-38)       | 26 (21-31)       | .185    |
| <b>Variables the Classes were Compared on following the Mixture Model Analysis</b> |                  |                  |                  |         |
| <b>Sex (No., %F)</b>                                                               | 22, 46.8         | 36, 58.1         | 35, 43.2         | > .200  |
| <b>Age (years)</b>                                                                 | 63.6 (59.9-67.2) | 64.3 (61.2-67.5) | 63.5 (61.0-65.9) | .905    |
| <b>Time Since Stroke (mo.)</b>                                                     | 36.1 (26.1-46.2) | 62.8 (41.2-84.4) | 41.7 (29.0-54.4) | .066    |
| <b>Baseline SPD<sup>a</sup></b>                                                    | 2095 (1636-2554) | 3792 (3373-4211) | 4850 (4522-5178) | < .001  |

Data represented as mean (95% Confidence Interval).

<sup>a</sup> All comparisons significant at  $p < .05$ .

<sup>b</sup> Statistically significant differences between class 1 vs. 3, class 2 vs. 3 at  $p < .05$ .

<sup>c</sup> Statistically significant differences between class 1 vs. class 3 at  $p < .05$ .

6MWT = Six Minute Walk Test; SSWS = Self-Selected Walking Speed; MoCA =

Montreal Cognitive Assessment; ABC = Activities Balance Confidence Scale; PHQ-9 =

Patient Health Questionnaire-9; CCI = Charlson Comorbidity Index; ADI = Area

Deprivation Index; SPD = steps-per-day.

#### Table 4. Class by Intervention Group Change in Steps-per-Day

Comparison of latent class by intervention group change in pre- to post-intervention

steps-per-day. There was a significant interaction effect ( $p = .016$ ).

|                              | FAST                       | SAM                         | FAST+SAM                   |
|------------------------------|----------------------------|-----------------------------|----------------------------|
| <b>Class 1<sup>a</sup></b>   | 314 ± 192<br>[-63 – 691]   | 1624 ± 611<br>[426 – 2821]  | 1150 ± 218<br>[723 – 1577] |
| <b>Class 2<sup>a,c</sup></b> | -219 ± 242<br>[-693 – 256] | 2002 ± 413<br>[1193 – 2811] | 867 ± 243<br>[391 – 1344]  |
| <b>Class 3<sup>b,c</sup></b> | 390 ± 332<br>[-260 – 1040] | 661 ± 304<br>[66 – 1256]    | 1532 ± 315<br>[915 – 2150] |

*All data reported as estimated marginal means ± SE, [95% Confidence Interval]*

<sup>a</sup> Statistically significant differences between FAST vs. SAM at  $p < .05$ .

<sup>b</sup> Statistically significant differences between FAST vs. FAST+SAM at  $p < .05$ .

<sup>c</sup> Statistically significant differences between SAM vs. FAST+SAM at  $p < .05$ .

**FIGURE LEGENDS/CAPTIONS AND TABLES**

**Figure 1.** CONSORT diagram. CPET = cardiopulmonary exercise test; FAST = high-intensity treadmill intervention; POST = end of the intervention; PT = physical therapy; SAM = step-activity behavioral intervention

## TOTAL CONSORT Flow Diagram

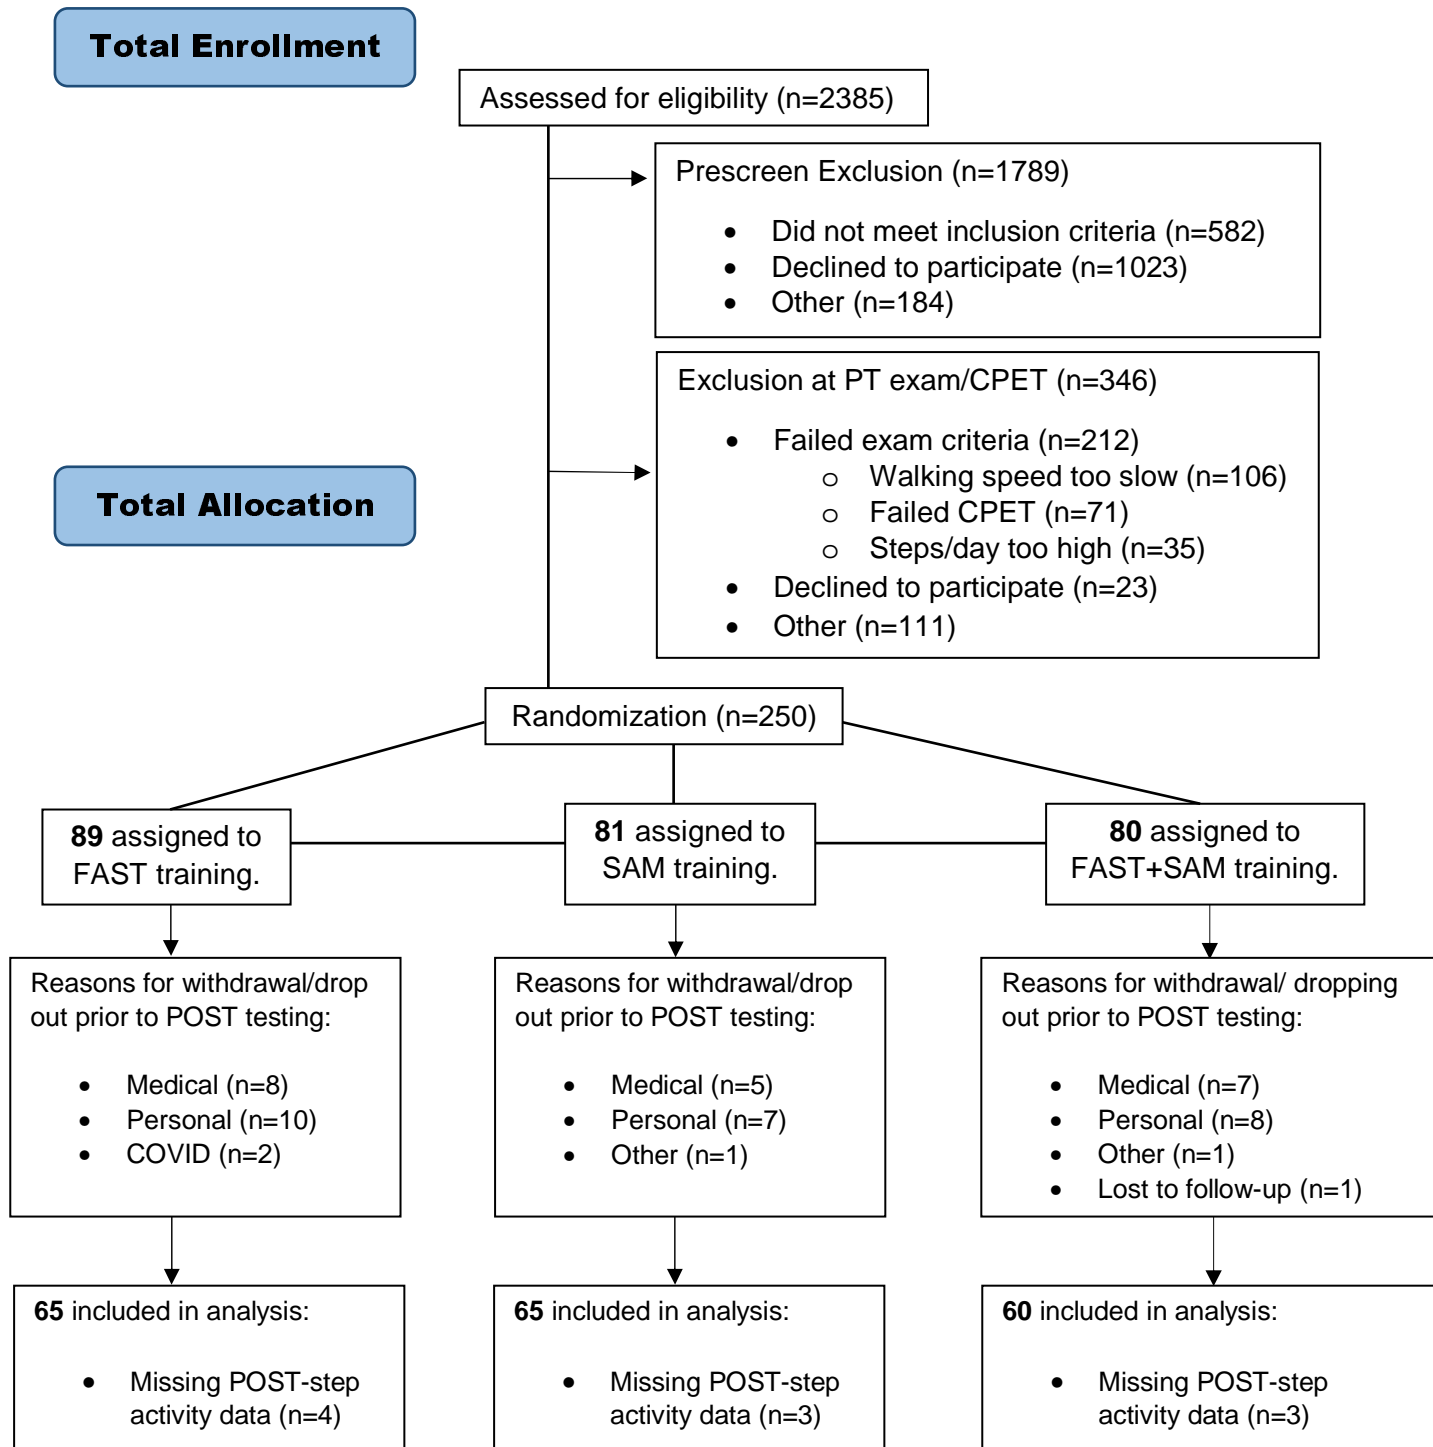

Source: https://medrxiv.org/content/10.1101/2024.11.14.24317334v1.full.pdf
